# Supplementary material for: Increased Drought Impacts on Temperate Rainforests from Southern South America: Results of a Process-Based, Dynamic Forest Model
Source: PubMed Central journal article supplement (PMC4113359; doi:10.1371/journal.pone.0103226), 2014-07-28
Supplement: pone.0103226.s001.pdf [file pone.0103226.s001.pdf]

Daily calculations

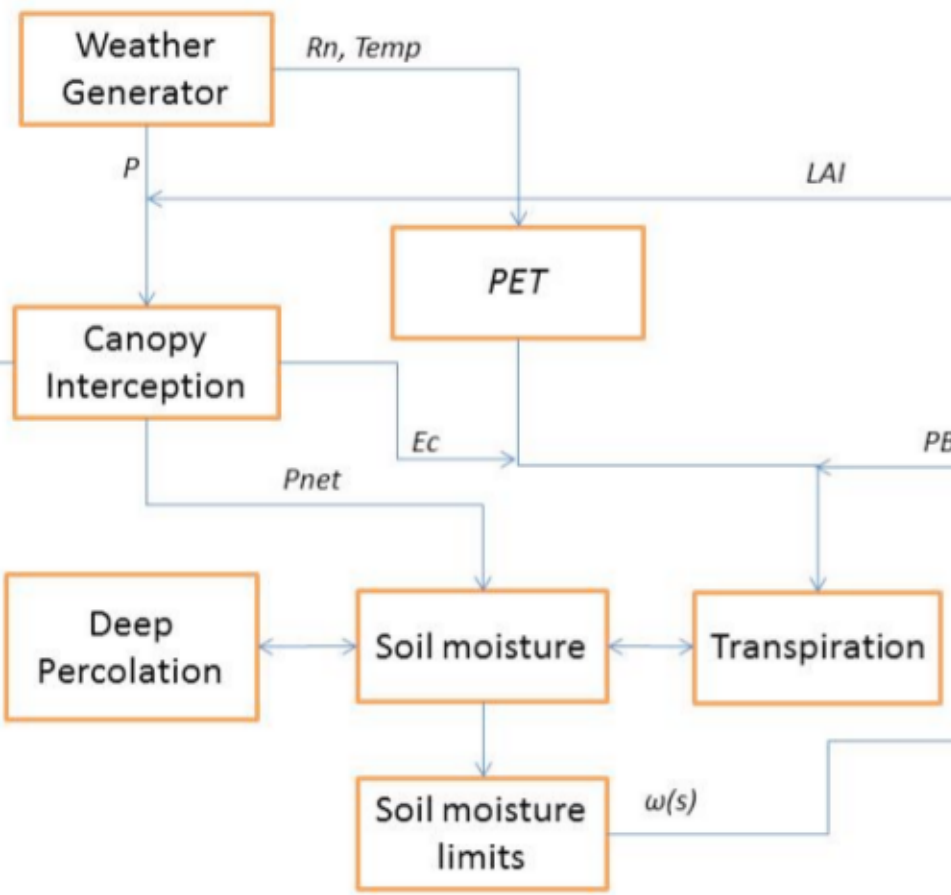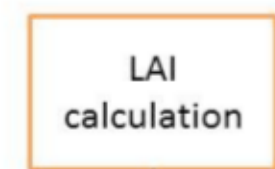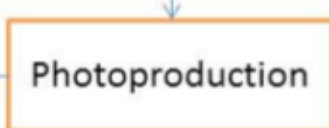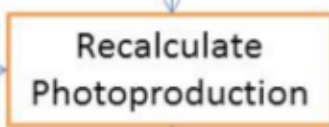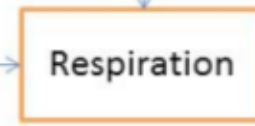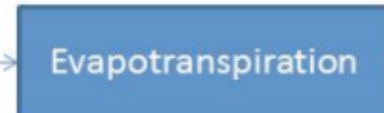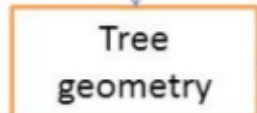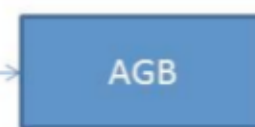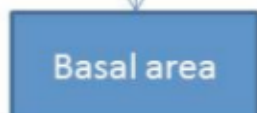

$E_c$

$Rn, Temp$

$P$

$PET$

$LAI$

$E_c$

$P_{net}$

$P_B$

$\omega(s)$

$T$

LAI calculation

Photoproduction

Recalculate Photoproduction

Respiration

Evapotranspiration

Tree geometry

AGB

Basal area
