# Supplementary material for: Increased Drought Impacts on Temperate Rainforests from Southern South America: Results of a Process-Based, Dynamic Forest Model
Source: PubMed Central journal article supplement (PMC4113359; doi:10.1371/journal.pone.0103226), 2014-07-28

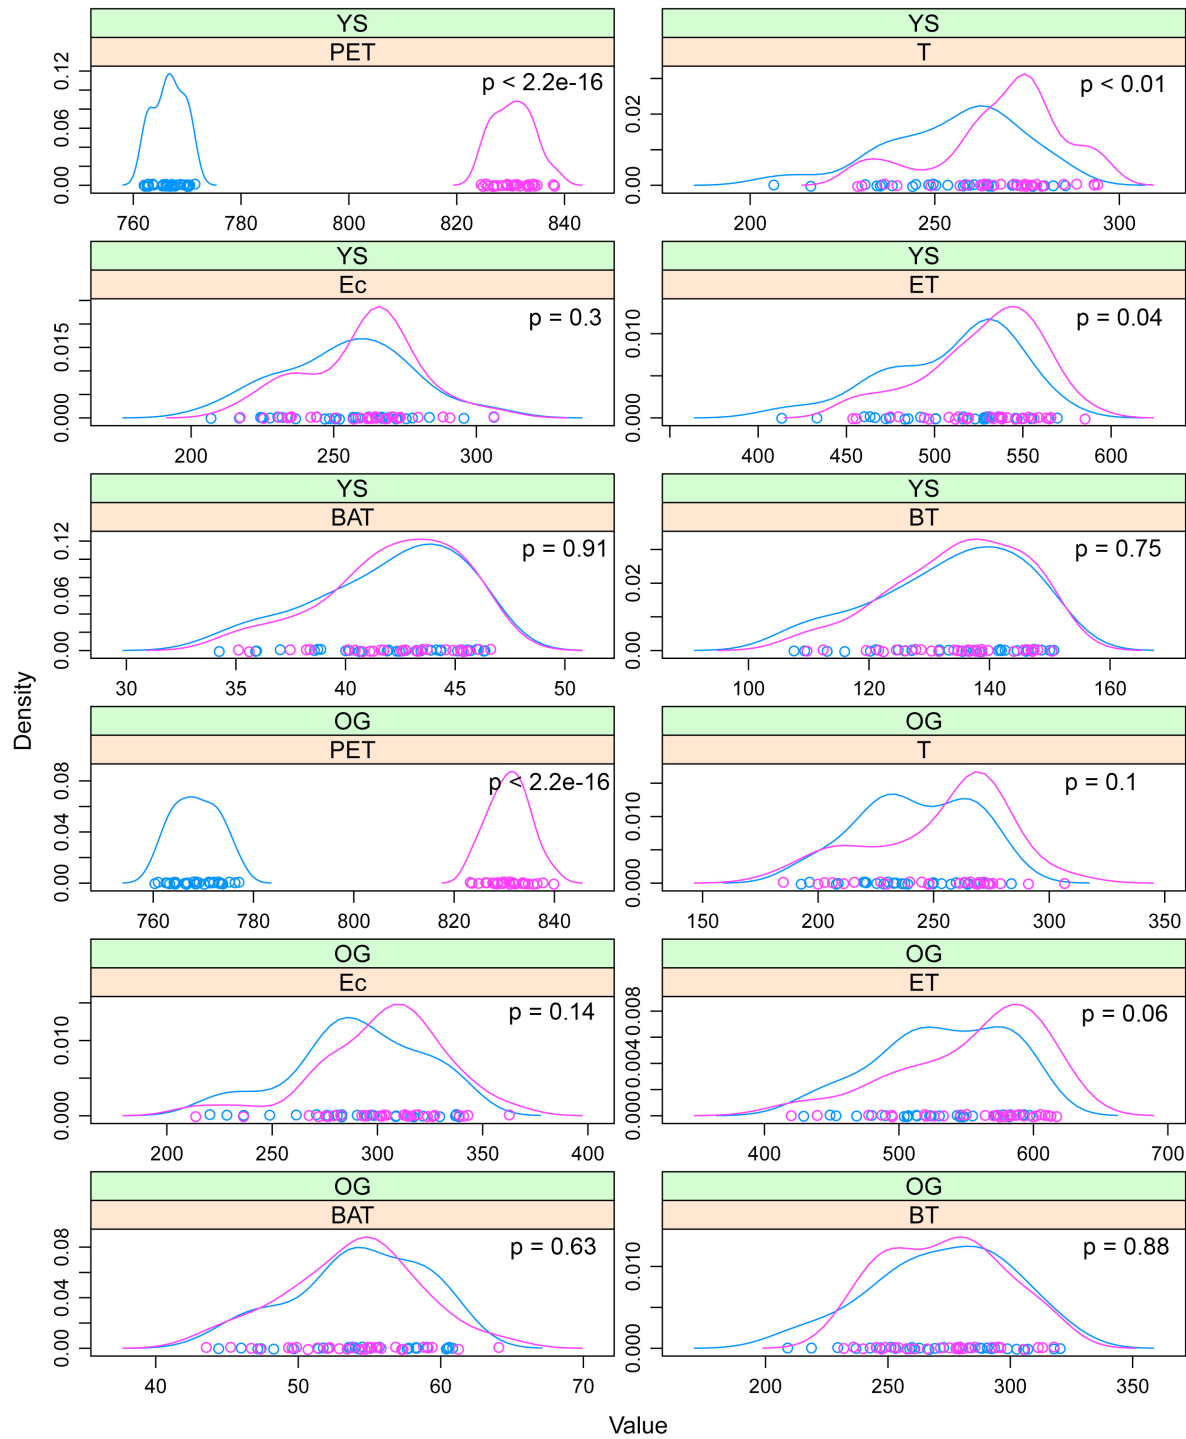

Supplement: pone.0103226.s005.pdf [file pone.0103226.s005.pdf]
